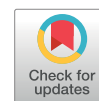

# Issues and Events

## STANDARDS OF CARE IN DIABETES—2024

The American Diabetes Association's "Standards of Care in Diabetes" is based on a complete review of the relevant literature and is intended to provide clinicians, researchers, policymakers, and other interested individuals with the components of diabetes care, general treatment goals, and tools to evaluate the quality of care. The American Diabetes Association Professional Practice Committee updates the Standards of Care annually and strives to include discussion of emerging clinical considerations. Access the 2024 Standards of Care at [diabetesjournals.org/care/issue/47/Supplement\\_1](https://diabetesjournals.org/care/issue/47/Supplement_1).

## NEW PODCAST: DIABETESBIO

*DiabetesBio* is a new monthly podcast of the American Diabetes Association's flagship research journal, *Diabetes*. The podcast is intended for diabetes researchers who are interested in the physiology and pathophysiology of diabetes. Hosts Drs. Kirk Habegger, Darleen Sandoval, and Kevin Williams explore the latest cutting-edge research on diabetes and related complications. For more information, please visit [diabetesjournals.org/diabetes/pages/diabetesbio](https://diabetesjournals.org/diabetes/pages/diabetesbio).

## 84th SCIENTIFIC SESSIONS: REGISTRATION IS OPEN

The 84th annual American Diabetes Association Scientific Sessions will be held in Orlando, Florida, 21–24 June 2024, at the Orange County Convention Center. Registration and housing are now open. For more information, please visit [professional.diabetes.org/scientific-sessions](https://professional.diabetes.org/scientific-sessions).

## NEW ARTICLE COLLECTION MAPS OUT CGM'S ROLE IN TRANSFORMING DIABETES MANAGEMENT

The global diabetes pandemic necessitates a shift in care practices for an expanding population with the disease. In a *Diabetes Spectrum* article collection titled "Roadmaps to Continuous Glucose Monitoring's Role in Transforming Diabetes Management," experts, led by guest editor Dr. Richard M. Bergenstal, explore how continuous glucose monitoring (CGM) can revolutionize diabetes care. The collection outlines step-by-step processes for

CGM implementation in key areas, emphasizing recent advances, addressing barriers, and envisioning a future where all can access transformative diabetes therapies. Access the collection at [diabetesjournals.org/spectrum/pages/cgm\\_roadmaps](https://diabetesjournals.org/spectrum/pages/cgm_roadmaps) for the latest insights on enhancing diabetes care.

## QUALITY IMPROVEMENT AND POPULATION HEALTH IN PRACTICE

*Clinical Diabetes* recently published an article collection outlining recent work by the T1D Exchange Quality Improvement Collaborative, a learning health system focusing on quality improvement projects to enhance the care of people with type 1 diabetes. The latest collection includes feature articles on understanding providers' readiness and attitudes toward autoantibody screening, institutional barriers to the successful implementation of telemedicine for type 1 diabetes care, and more. Please visit [diabetesjournals.org/collection/1849/Quality-Improvement-and-Population-Health](https://diabetesjournals.org/collection/1849/Quality-Improvement-and-Population-Health).

## SPECIAL PODCAST: TRIGLYCERIDES

In a special two-episode series of *Diabetes Core Update*, the American Diabetes Association podcast for primary care clinicians, Dr. Christie Ballantyne sits down with host Dr. Neil Skolnik to discuss triglycerides and how to reduce residual risk. This series is supported by an independent educational grant from Amarin. For more information, please visit [diabetesjournals.org/journals/pages/triglycerides\\_podcasts](https://diabetesjournals.org/journals/pages/triglycerides_podcasts).

## SPECIAL PODCAST: THE IMPORTANCE OF NUTRIENT-DENSE DIETS

In a special two-episode series of *Diabetes Core Update*, the American Diabetes Association podcast for primary care clinicians, Dr. Nikki Ford and expert guests sit down with Dr. Neil Skolnik to discuss the importance of a nutrient-dense diet for diabetes management and risk reduction. This special series is made possible by Fresh Avocados—Love One Today. For more information, please visit [diabetesjournals.org/journals/pages/nutrition\\_podcasts](https://diabetesjournals.org/journals/pages/nutrition_podcasts).

**Diabetes Care** (print ISSN 0149-5992, online ISSN 1935-5548) is owned, controlled, and published monthly by the American Diabetes Association, Inc., 2451 Crystal Drive, Suite 900, Arlington, VA 22202. *Diabetes Care* is a registered trademark of the American Diabetes Association. **Periodicals postage** paid at Arlington, VA, and additional mailing offices. **POSTMASTER:** Send all UAA to CFS (see DMM 507.1.5.2). **NON-POSTAL AND MILITARY FACILITIES:** Send address corrections to American Diabetes Association, Membership & Publication Operations, PO Box 37433, Boone, IA 50037-0433. Claims for missing issues should be made within 6 months of publication. The publisher expects to supply missing issues free of charge only when losses have been sustained in transit and when the reserve stock permits.
